# Supplementary material for: Effect of trans-Cinnamaldehyde on Methicillin-Resistant Staphylococcus aureus Biofilm Formation: Metabolic Activity Assessment and Analysis of the Biofilm-Associated Genes Expression
Source: MDPI journal article supplement (doi:10.3390/ijms21010102), 2019-12-22
Supplement: s1 [file s1]

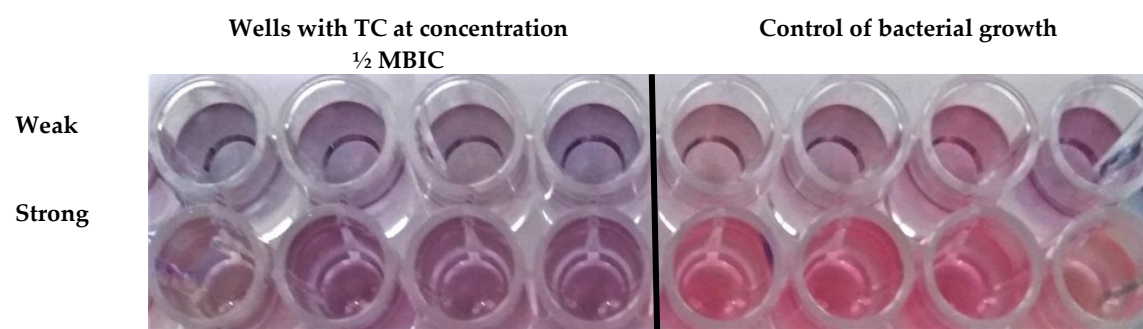

**Figure S1.** Effect of TC at concentration  $\frac{1}{2}$  MBIC on MRSA biofilm metabolic activity after 3 h of treatment, evaluated by the resazurin microtiter-plate assay. The quantitative analysis of biofilm metabolic activity was determined by measurement (at 595 nm) of the optical density of biofilms containing 0.01% resazurin.

**Table S1.** Three-factorial ANOVA analysis of the studied variables (strains, treatment, growth period) and interactions on relative expression of the examined genes (*icaA*, *icaD*, *eno*, *ebps*, *fib*) of MRSA strains.

| Variables         | <i>icaA</i>              | <i>icaD</i>              | <i>eno</i>               | <i>ebps</i>           | <i>fib</i>             |
|-------------------|--------------------------|--------------------------|--------------------------|-----------------------|------------------------|
| Strains (S)       | $F_{1,48} = 524$ (***)   | $F_{1,48} = 112$ (**)    | $F_{1,48} = 2,108$ (***) | $F_{1,48} = 75$ (*)   | $F_{1,48} = 803$ (***) |
| Treatment (T)     | $F_{2,48} = 9,157$ (***) | $F_{2,48} = 1,831$ (***) | $F_{2,48} = 7,120$ (***) | $F_{2,48} = 134$ (*)  | $F_{2,48} = 445$ (***) |
| Growth period (G) | $F_{3,48} = 163$ (**)    | $F_{3,48} = 355$ (***)   | $F_{3,48} = 129$ (**)    | $F_{3,48} = 208$ (**) | $F_{3,48} = 177$ (**)  |
| S × T             | $F_{2,48} = 315$ (***)   | $F_{2,48} = 670$ (***)   | $F_{2,48} = 92$ (*)      | $F_{2,48} = 2$ (ns)   | $F_{2,48} = 28$ (*)    |
| T × G             | $F_{6,48} = 120$ (**)    | $F_{6,48} = 178$ (**)    | $F_{6,48} = 14$ (*)      | $F_{6,48} = 61$ (*)   | $F_{6,48} = 45$ (*)    |
| S × G             | $F_{3,48} = 38$ (*)      | $F_{3,48} = 99$ (*)      | $F_{3,48} = 25$ (*)      | $F_{3,48} = 19$ (*)   | $F_{3,48} = 622$ (***) |
| S × T × G         | $F_{6,48} = 104$ (*)     | $F_{6,48} = 81$ (*)      | $F_{6,48} = 6$ (*)       | $F_{6,48} = 1$ (ns)   | $F_{6,48} = 18$ (*)    |

\*  $P < 0.05$ ; \*\*  $P < 0.01$ ; \*\*\*  $P < 0.001$ ; ns – non-significant. Variability source: i) strains – weak and strong biofilm formation; ii) treatment: [control](#), 1/8 and 1/2 MBIC; iii) growth period – 3, 6, 8 and 12 h.

**Table S2.** Three-factorial ANOVA analysis of the studied variables (strains, treatment, growth period) and interactions on the metabolic activity of MRSA strains.

| Variables               | Metabolic activity     |
|-------------------------|------------------------|
| Strains (S)             | $F_{1,48} = 125$ (**)  |
| Treatment (T)           | $F_{2,48} = 247$ (***) |
| Growth period (G)       | $F_{3,48} = 98$ (**)   |
| S $\times$ T            | $F_{2,48} = 6$ (*)     |
| T $\times$ G            | $F_{6,48} = 11$ (*)    |
| S $\times$ G            | $F_{3,48} = 15$ (*)    |
| S $\times$ T $\times$ G | $F_{6,48} = 2$ (ns)    |

\*  $P < 0.05$ ; \*\*  $P < 0.01$ ; \*\*\*  $P < 0.001$ ; ns – non-significant. Variability source:

i) strains – weak and strong biofilm formation; ii) treatment – control,

$\frac{1}{8}$  and  $\frac{1}{2}$  MBIC; iii) growth period – 3, 6, 8 and 12 h.
